# Supplementary material
Source: Springer Nature journal article supplement (https://www.springermedizin.de/resource/supplementary/13054_2011_9803_MOESM4_ESM.pdf/9706998)

# AKI

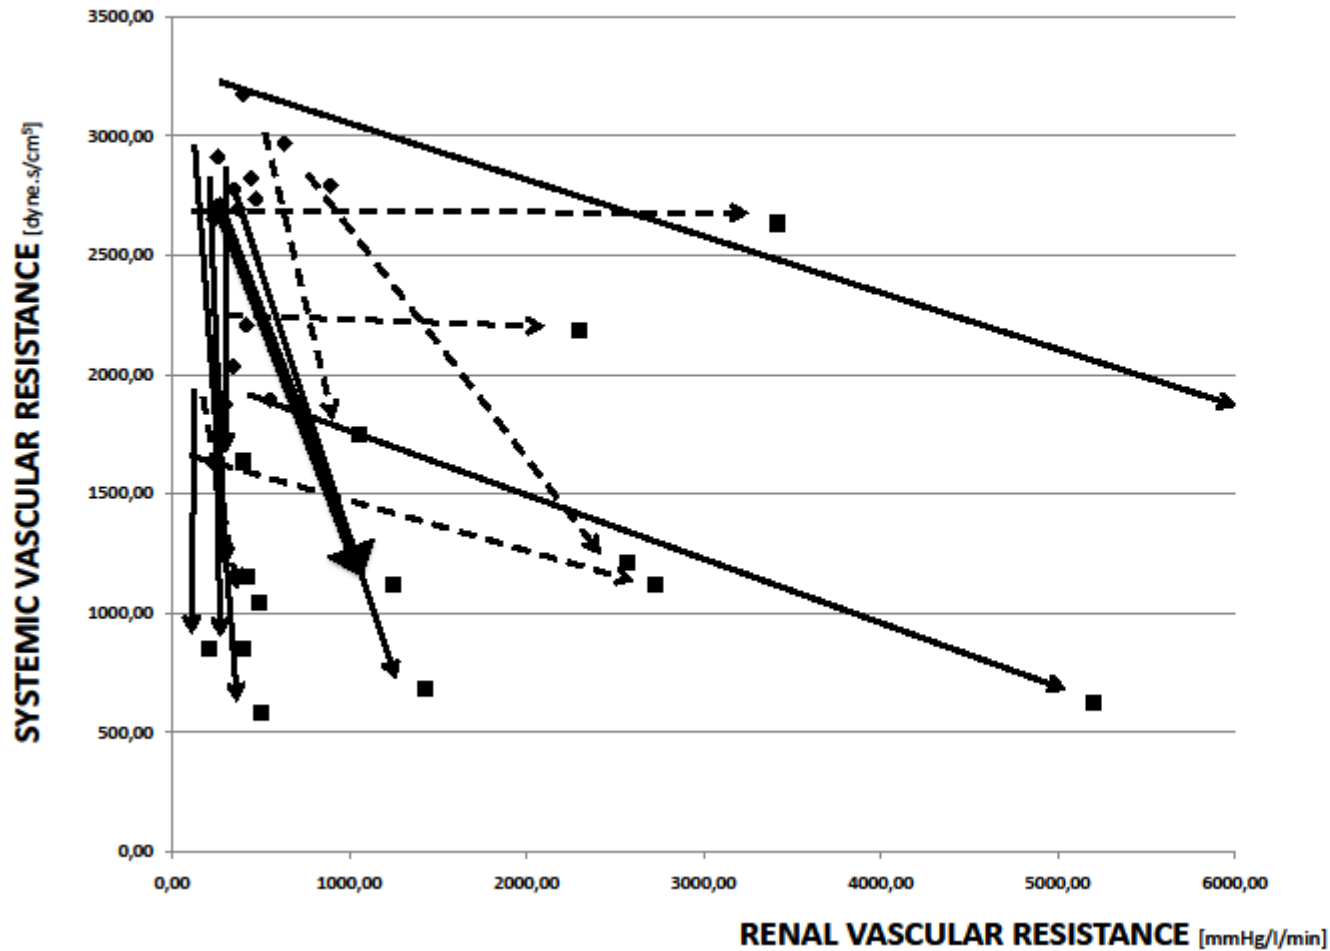

# NON-AKI

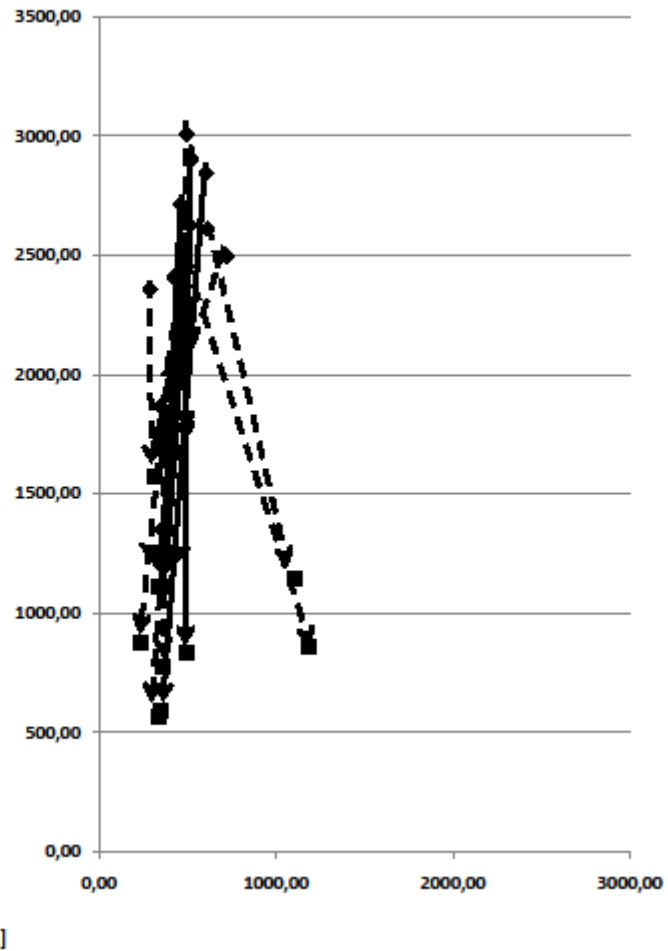

Supplement: MOESM4 [file 9706998]
